# Supplementary material for: Prion-Like Domain Dysfunction in SMN1 Initiates Aberrant hnRNP Assembly, Multiple Protein Aggregation and Causing Spinal Muscular Atrophy
Source: Research Square preprint supplement (doi:10.21203/rs.3.rs-3341542/v1), 2023-10-17
Supplement: Supplementary file 1 [file 06bade69e8ce2dc3129b2f48.docx]

**Extended Data Figures**

**Extended Data Fig. 1｜Analysis of the cross-β conformation of SMN1 in mes23.5 cells.**

**Extended Data Fig. 2｜RT-qPCR analysis of the mRNA levels of SMN-FL and SMNΔ7 in mice treated with or without baicalein.**

The data presented were normalized to the GAPDH level and are shown as the mean ± SD (*n* = 4) mice in each group, unpaired two-tailed Student’s *t*-test.

**Extended Data Fig. 3｜The treatments of SMA Type I mice with baicalein**

The therapeutic effects of baicalein on motor function in SMA mice**.** SMA mice and their heterozygous littermates were treated with daily intraperitoneal baicalein injections from birth and then subjected to motor functional analyses. The righting times (left panel), tube scores (middle panel), and tilting scores (right panel) of untreated (SMA, *n*=27; heterozygous, *n*=23) and baicalein-treated (SMA/TX, *n*=18; heterozygous/TX, *n*=27) SMA and heterozygous mice are shown. The motor function of SMA mice was significantly improved after baicalein treatment, particularly on postnatal day 6, and was partially improved on postnatal day 8 (*one-way* ANOVA with the LSD post hoc test). * p<0.05, ** p<0.01, *** p<0.001. The lifespans of SMA mice were not significantly different after baicalein treatment (p=0.13, log-rank test). **b** & **c,** baicalein treatment did not improve body weight gains in SMA mice.

**Supplementary Methods**

**Reverse Transcription and Real-time PCR**

Tissues from mice were dissected, and total RNA was extracted by TrizolTM reagent (Thermo Fisher Scientific) according to the manufacturer’s protocol. Reverse transcription was performed using an iScriptTM cDNA synthesis kit (Bio-Rad) and processed for quantitative PCR analysis on a CFX Connect Real-time system with built-in CFX Maestro software (Bio-Rad). The primer sequences for qPCR were as follows: SMNexon7 forward (F): 5’-GAAAAAGAAGGAAGGTGCTCACATT-3’; SMNexon 7 reverse (R): 5’-GTGTCATTTAGTGCTGCTCTATGC-3’; SMNΔ7 F: 5’-CATGGTACATGAGTGGCTATCATACTG-3’; SMNΔ7 R: 5’-TGGTGTCATTTA

GTGCTGCTCTATG-3’; GAPDH F: 5’-GACTTCAACAGCAACTCC-3’; and GAPDH R: 5’-TATTCATTGTCATACCAGGAA-3’.
